# Supplementary material
Source: bioRxiv or medRxiv preprint supplement (https://medrxiv.org/highwire/filestream/98304/field_highwire_adjunct_files/0/2020.09.25.20176032-1.pdf)

PCA plot of SPG7 cohort

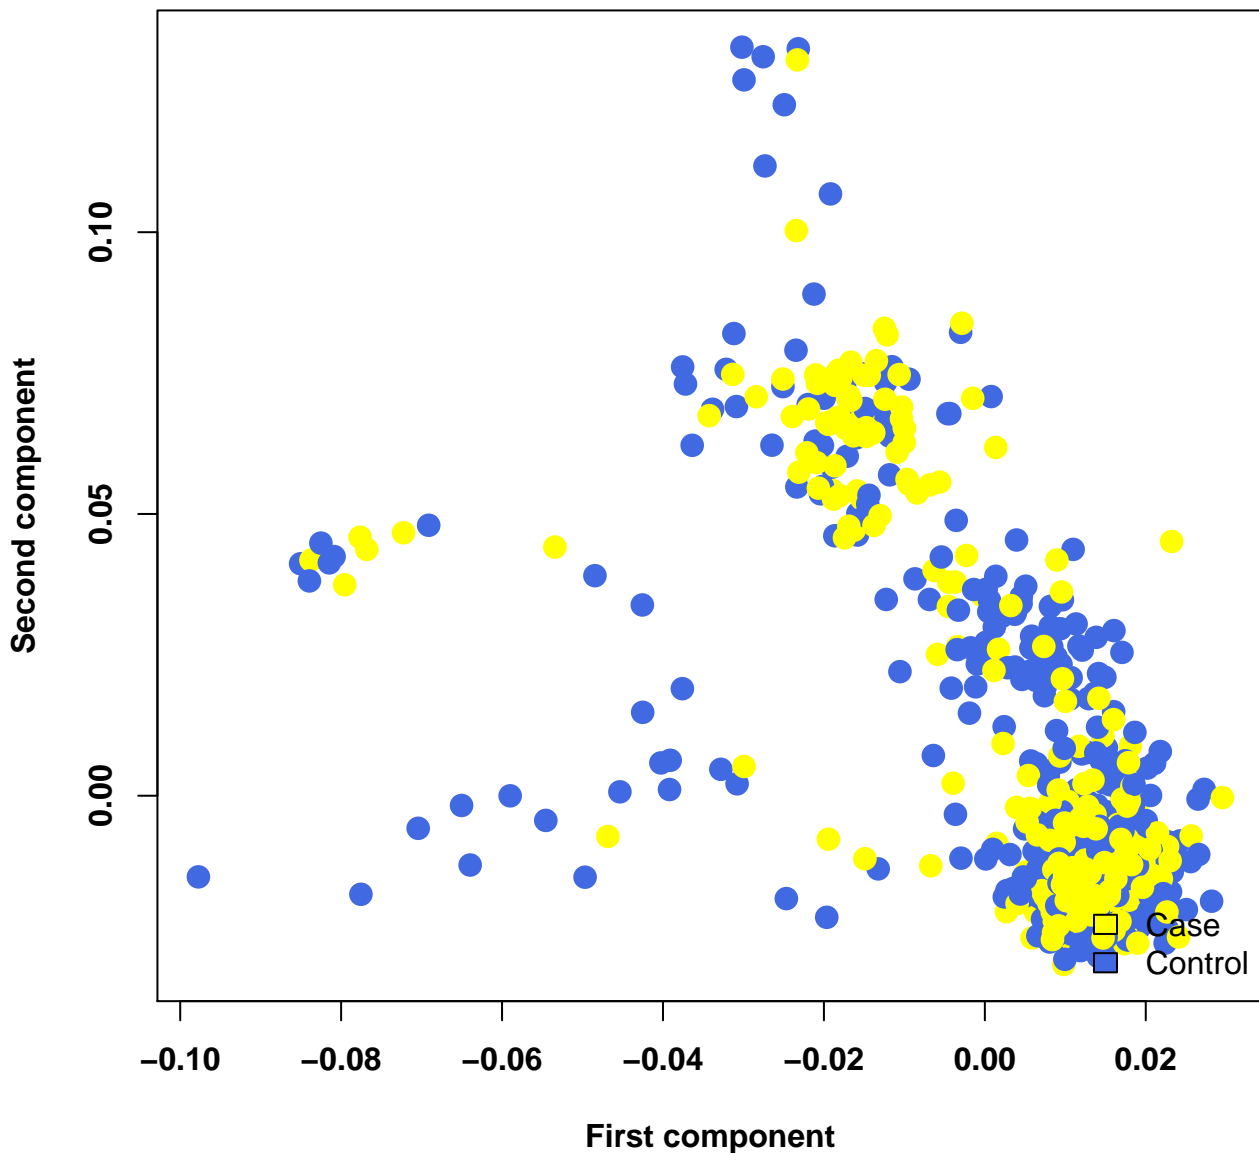

Supplement: Supplementary file [file 2020.09.25.20176032-1.pdf]
